# Supplementary material
Source: PubMed Central journal article supplement (PMC8678147)
Supplement: NIHMS1728171-supplement-supinfo.pdf [file NIHMS1728171-supplement-supinfo.pdf]

## SUPPLEMENTARY INFORMATION

Figure S1. Observation time

Table S1. Validated algorithm to ascertain serious hypoglycemia outcome

Table S2. Time-varying potential confounders controlled for using conditional Poisson regression model

Table S3. ICD-9-CM diagnosis codes used to identify acute infections

Table S4. Sensitivity analysis: Rate ratios of serious hypoglycemia occurrence from the use of insulin secretagogues or metformin with versus without concomitant use of angiotensin-converting enzyme inhibitors, including observation time during which death occurred

Table S5. Sensitivity analysis: Rate ratios of serious hypoglycemia occurrence from the use of insulin secretagogues or metformin with versus without concomitant use of angiotensin-converting enzyme inhibitors, excluding observation time with potentially incomplete data

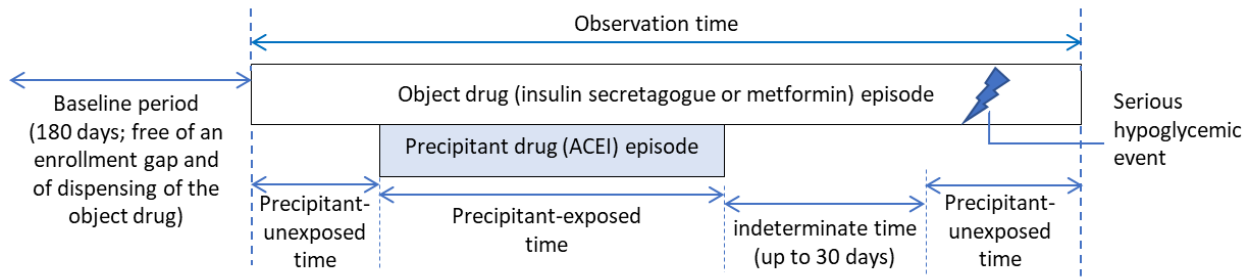

**Figure S1. Observation time**

ACEI: angiotensin-converting enzyme inhibitor. Observation time, in which at least one outcome (serious hypoglycemia) occurrence was required, was constructed for each object drug separately. An object drug episode began at the first dispensing date of that episode and ended by end of days' supply of the episode (including a 7-day grace period), Medicaid enrollment discontinuation, or end of dataset, whichever occurred first. A precipitant drug episode was allowed to begin on, before, or after the start date of the object drug episode. More than one precipitant drug episode was allowed within an object drug's observation time. Indeterminate time lasted up to 30 days, or until another prescription for the precipitant was dispensed. We performed a sensitivity analysis that included observation time censored by death.

**Table S1. Validated algorithm to ascertain serious hypoglycemia outcome**

| Description                                                                      |                                                             | ICD-9-CM code | Diagnosis code position and claims type                                                  | Validation statistics                                                  |
|----------------------------------------------------------------------------------|-------------------------------------------------------------|---------------|------------------------------------------------------------------------------------------|------------------------------------------------------------------------|
| Hypoglycemic coma                                                                |                                                             | 251.0         | Any position of discharge diagnosis in ED claim or principal position in inpatient claim | PPV ~89% <sup>22</sup> (ED claim); 78% <sup>23</sup> (inpatient claim) |
| Other specific hypoglycemia                                                      |                                                             | 251.1         |                                                                                          |                                                                        |
| Hypoglycemia, unspecified                                                        |                                                             | 251.2         |                                                                                          |                                                                        |
| Diabetes with other specified manifestations                                     |                                                             | 250.8X        |                                                                                          |                                                                        |
| <i>Exclusionary diagnosis codes in the occurrences of 250.8X<sup>22,23</sup></i> |                                                             |               |                                                                                          |                                                                        |
| Secondary diabetic glycogenesis                                                  | Other specified endocrine disorders                         | 259.8         |                                                                                          |                                                                        |
| Diabetic lipodosis                                                               | Mixed hyperlipidemia                                        | 272.7         |                                                                                          |                                                                        |
| Cellulitis                                                                       | Cellulitis and abscess of finger and toe                    | 681.XX        |                                                                                          |                                                                        |
|                                                                                  | Other cellulitis and abscess                                | 682.XX        |                                                                                          |                                                                        |
|                                                                                  | Unspecified local infection of skin and subcutaneous tissue | 686.9         |                                                                                          |                                                                        |
| Ulcers of the lower extremity                                                    | Ulcer of lower limbs, except decubitus ulcer                | 707.1X        |                                                                                          |                                                                        |
|                                                                                  | Pressure ulcer stages                                       | 707.2X        |                                                                                          |                                                                        |
|                                                                                  | Chronic ulcer of other specified sites                      | 707.8         |                                                                                          |                                                                        |
|                                                                                  | Chronic ulcer of unspecified site                           | 707.9         |                                                                                          |                                                                        |
| Necrobiosis lipoidica diabetorum                                                 | Degenerative skin disorders                                 | 709.3         |                                                                                          |                                                                        |
| Osteomyelitis                                                                    | Acute osteomyelitis                                         | 730.0X        |                                                                                          |                                                                        |
|                                                                                  | Chronic osteomyelitis                                       | 730.1X        |                                                                                          |                                                                        |
|                                                                                  | Unspecified osteomyelitis                                   | 730.2X        |                                                                                          |                                                                        |
|                                                                                  | Other bone involvement in diseases classified elsewhere     | 731.8         |                                                                                          |                                                                        |

ED: emergency department. ICD-9-CM: International Classification of Diseases, 9th Revision, Clinical Modification. PPV: positive predictive value.

**Table S2. Time-varying potential confounders controlled for using conditional Poisson regression model**

|                                                                                         |                                                                                                                                                                                                                                                                                                                                                                                                                                                                                                                                   |
|-----------------------------------------------------------------------------------------|-----------------------------------------------------------------------------------------------------------------------------------------------------------------------------------------------------------------------------------------------------------------------------------------------------------------------------------------------------------------------------------------------------------------------------------------------------------------------------------------------------------------------------------|
| <b>Drugs that may be associated with hypoglycemia*</b>                                  |                                                                                                                                                                                                                                                                                                                                                                                                                                                                                                                                   |
| Anti-infectives <sup>†</sup>                                                            | alatrofloxacin, cinoxacin, ciprofloxacin, chloramphenicol, chloroquine, enoxacin, gatifloxacin, gemifloxacin, grepafloxacin, levofloxacin, lomefloxacin, moxifloxacin, nalidixic acid, norfloxacin, ofloxacin, pentamidine, quinine, sparfloxacin, sulfamethoxazole, trimethoprim, trovafloxacin                                                                                                                                                                                                                                  |
| ARBs <sup>‡</sup>                                                                       | losartan, candesartan, valsartan, irbesartan, eprosartan, olmesartan, telmisartan, azilsartan                                                                                                                                                                                                                                                                                                                                                                                                                                     |
| Beta blockers <sup>‡</sup>                                                              | acebutolol, atenolol, betaxolol, bisoprolol, carteolol, labetalol, metoprolol, nadolol, nebivolol, penbutolol, pindolol, propranolol, sotalol, timolol                                                                                                                                                                                                                                                                                                                                                                            |
| Calcium channel blockers <sup>‡</sup>                                                   | amlodipine, diltiazem, felodipine, isradipine, nicardipine, nifedipine, nimodipine, nisoldipine, verapamil                                                                                                                                                                                                                                                                                                                                                                                                                        |
| Salicylates <sup>‡</sup>                                                                | aminosalicylic acid, aspirin, bismuth subsalicylate, choline salicylate, magnesium salicylate, magnesium salicylate tetrahydrate, phenyl salicylate, salicylic acid, salsalate, sodium salicylate, sodium thiosalicylate                                                                                                                                                                                                                                                                                                          |
| Others <sup>‡</sup>                                                                     | haloperidol, quinidine, clofibrate, disopyramide                                                                                                                                                                                                                                                                                                                                                                                                                                                                                  |
| <b>Drugs that may be associated with hyperglycemia*</b>                                 |                                                                                                                                                                                                                                                                                                                                                                                                                                                                                                                                   |
| Atypical antipsychotics <sup>‡</sup>                                                    | aripiprazole, clozapine, iloperidone, lurasidone, olanzapine, paliperidone, quetiapine, risperidone, ziprasidone                                                                                                                                                                                                                                                                                                                                                                                                                  |
| Calcineurin inhibitors <sup>‡</sup>                                                     | cyclosporine, sirolimus, tacrolimus                                                                                                                                                                                                                                                                                                                                                                                                                                                                                               |
| Corticosteroids <sup>‡</sup>                                                            | betamethasone, budesonide, cortisone, dexamethasone, fluodrocortisone, hydrocortisone, methylprednisolone, prednisolone, prednisone, triamcinolone                                                                                                                                                                                                                                                                                                                                                                                |
| Protease inhibitors <sup>‡</sup>                                                        | amprenavir, atazanavir, darunavir, fosamprenavir, indinavir, lopinavir, nelfinavir, ritonavir, saquinavir, tipranavir                                                                                                                                                                                                                                                                                                                                                                                                             |
| Furosemide <sup>‡</sup>                                                                 | furosemide                                                                                                                                                                                                                                                                                                                                                                                                                                                                                                                        |
| Thiazide and thiazide-like diuretics <sup>‡</sup>                                       | bendroflumethiazide, benzthiazide, chlorothiazide, chlorthalidone, hydrochlorothiazide, hydroflumethiazide, indapamide, methyclothiazide, metolazone, polythiazide, trichlormethiazide                                                                                                                                                                                                                                                                                                                                            |
| <b>Drugs that may interact with insulin secretagogues*</b>                              |                                                                                                                                                                                                                                                                                                                                                                                                                                                                                                                                   |
| CYP2C9 inhibitors                                                                       | amiodarone <sup>‡</sup> , capecitabine <sup>‡</sup> , cotrimoxazole <sup>‡</sup> , efavirenz <sup>‡</sup> , fenofibrate <sup>‡</sup> , fluconazole <sup>‡</sup> , isoniazid <sup>‡</sup> , lovastatin <sup>‡</sup> , metronidazole <sup>‡</sup> , miconazole <sup>‡</sup> , oxandrolone <sup>‡</sup> , paroxetine <sup>‡</sup> , probenecid <sup>‡</sup> , sulfamethoxazole <sup>‡</sup> , sulfipyrazone <sup>‡</sup> , teniposide <sup>‡</sup> , tigecycline <sup>‡</sup> , voriconazole <sup>‡</sup> , zafirlukast <sup>‡</sup> |
| CYP3A4 inhibitors                                                                       | azithromycin <sup>‡</sup> , clarithromycin <sup>‡</sup> , erythromycin <sup>‡</sup> , simvastatin <sup>‡</sup> , gemfibrozil <sup>‡</sup>                                                                                                                                                                                                                                                                                                                                                                                         |
| Insulin <sup>‡</sup>                                                                    | insulin                                                                                                                                                                                                                                                                                                                                                                                                                                                                                                                           |
| Other non-insulin antidiabetes drugs <sup>‡</sup>                                       | acarbose, exenatide, linagliptin, pioglitazone, pramlintide, rosiglitazone, saxagliptin                                                                                                                                                                                                                                                                                                                                                                                                                                           |
| <b>Major non-chronic condition that may be associated with hypoglycemia<sup>§</sup></b> |                                                                                                                                                                                                                                                                                                                                                                                                                                                                                                                                   |
| Acute infection <sup>†</sup>                                                            | Acute infection identified by discharge diagnosis codes appearing at any position in inpatient or outpatient claims                                                                                                                                                                                                                                                                                                                                                                                                               |
| Others <sup>  </sup>                                                                    | Age, nursing home residence status, Medicaid-Medicare dual-enrollment status, concomitant metformin use when the object drug was an insulin secretagogue                                                                                                                                                                                                                                                                                                                                                                          |

ARB: angiotensin II receptor blockers. CYP: cytochrome P450 enzyme. \*Identified by National Drug Codes, dispensing date, and days' supply. <sup>†</sup>Measured as a person-day level binary variable indicating being dispensed or diagnosed on the current day or any time during the 15 days prior to the current day. <sup>‡</sup>Measured as a person-day level binary variable indicating being dispensed on the current day (refers to each day during the observation time as current) or any time during the 30 days prior to the current day. <sup>§</sup>Identified by International Classification of Diseases, 9th Revision, Clinical Modification diagnosis codes, and admission or service date. <sup>||</sup>Measured on the current day; binary variables except for age (continuous variable).

**Table S3. ICD-9-CM diagnosis codes used to identify acute infections**

| ICD-9-CM code                | Description                                                                    |
|------------------------------|--------------------------------------------------------------------------------|
| 001.*                        | Cholera                                                                        |
| 002.*                        | Typhoid and paratyphoid fevers                                                 |
| 003.*                        | Other salmonella infections                                                    |
| 004.*                        | Shigellosis                                                                    |
| 005.*                        | Other food poisoning (bacterial)                                               |
| 006.*, except 006.1          | Amebiasis                                                                      |
| 007.*                        | Other protozoal intestinal diseases                                            |
| 008.*                        | Intestinal infections due to other organisms                                   |
| 009.*                        | Ill-defined intestinal infections                                              |
| 018.0*                       | Miliary tuberculosis                                                           |
| 020.*                        | Plague                                                                         |
| 021.*                        | Tularemia                                                                      |
| 022.*                        | Anthrax                                                                        |
| 023.*                        | Brucellosis                                                                    |
| 024                          | Glanders                                                                       |
| 025                          | Melioidosis                                                                    |
| 026.*                        | Rat-bite fever                                                                 |
| 027.*                        | Other zoonotic bacterial diseases                                              |
| 030.*                        | Leprosy                                                                        |
| 031.*                        | Diseases due to other mycobacteria                                             |
| 032.*                        | Diphtheria                                                                     |
| 033.*                        | Whooping cough                                                                 |
| 034.*                        | Streptococcal sore throat and scarlet fever                                    |
| 035                          | Erysipelas                                                                     |
| 036.*                        | Meningococcal infection                                                        |
| 037                          | Tetanus                                                                        |
| 038.*                        | Septicemia                                                                     |
| 039.*, except 039.4          | Actinomycotic infections                                                       |
| 040.*, except 040.1          | Other bacterial diseases                                                       |
| 041.*, except 041.81         | Bacterial infection in conditions classified elsewhere and of unspecified site |
| 045.*                        | Acute poliomyelitis                                                            |
| 047.*                        | Meningitis due to enterovirus                                                  |
| 048                          | Other enterovirus diseases of central nervous system                           |
| 049.*                        | Other non-arthropod-borne viral diseases of central nervous system             |
| 050.*                        | Smallpox                                                                       |
| 051.*                        | Cowpox and paravaccinia                                                        |
| 052.*                        | Chickenpox                                                                     |
| 053.*, except 053.12, 053.13 | Herpes zoster                                                                  |
| 054.*                        | Herpes simplex                                                                 |
| 055.*                        | Measles                                                                        |
| 056.*                        | Rubella                                                                        |
| 057.*                        | Other viral exanthemata                                                        |
| 058.*                        | Other human herpesvirus                                                        |
| 059.*                        | Other poxvirus infections                                                      |
| 060.*                        | Yellow fever                                                                   |
| 061                          | Dengue                                                                         |
| 062.*                        | Mosquito-borne viral encephalitis                                              |
| 063.*                        | Tick-borne viral encephalitis                                                  |

| ICD-9-CM code                                                      | Description                                                                               |
|--------------------------------------------------------------------|-------------------------------------------------------------------------------------------|
| 064                                                                | Viral encephalitis transmitted by other and unspecified arthropods                        |
| 065.*                                                              | Arthropod-borne hemorrhagic fever                                                         |
| 066.*                                                              | Other arthropod-borne viral diseases                                                      |
| 070.*, except 070.22,<br>070.23, 070.32, 070.33,<br>070.44, 070.54 | Viral hepatitis                                                                           |
| 071                                                                | Rabies                                                                                    |
| 072.*                                                              | Mumps                                                                                     |
| 073.*                                                              | Ornithosis                                                                                |
| 074.*                                                              | Specific diseases due to coxsackie virus                                                  |
| 075                                                                | Infectious mononucleosis                                                                  |
| 076.*                                                              | Trachoma                                                                                  |
| 077.*                                                              | Other diseases of conjunctiva due to viruses and chlamydiae                               |
| 078.*                                                              | Other diseases due to viruses and chlamydiae                                              |
| 079.*, except 079.51,<br>079.52, 079.53                            | Viral and chlamydial infection in conditions classified elsewhere and of unspecified site |
| 080                                                                | Louse-borne (epidemic) typhus                                                             |
| 081.*                                                              | Other typhus                                                                              |
| 082.*                                                              | Tick-borne rickettsioses                                                                  |
| 083.*                                                              | Other rickettsioses                                                                       |
| 084.*                                                              | Malaria                                                                                   |
| 085.*                                                              | Leishmaniasis                                                                             |
| 086.*                                                              | Trypanosomiasis                                                                           |
| 087.*                                                              | Relapsing fever                                                                           |
| 088.*                                                              | Other arthropod-borne diseases                                                            |
| 090.*                                                              | Congenital syphilis                                                                       |
| 091.*                                                              | Early syphilis symptomatic                                                                |
| 092.*                                                              | Early syphilis latent                                                                     |
| 093.*                                                              | Cardiovascular syphilis                                                                   |
| 094.*                                                              | Neurosyphilis                                                                             |
| 095.*                                                              | Other forms of late syphilis with symptoms                                                |
| 096                                                                | Late syphilis, latent                                                                     |
| 097.*                                                              | Other and unspecified syphilis                                                            |
| 098.*, except 098.2,<br>098.3*                                     | Gonococcal infections                                                                     |
| 099.*                                                              | Other venereal diseases                                                                   |
| 100.*                                                              | Leptospirosis                                                                             |
| 101                                                                | Vincent's angina                                                                          |
| 103.*                                                              | Pinta                                                                                     |
| 104.*                                                              | Other spirochetal infection                                                               |
| 110.*                                                              | Dermatophytosis                                                                           |
| 111.*                                                              | Dermatomycosis other and unspecified                                                      |
| 112.*                                                              | Candidiasis                                                                               |
| 114.*, except 114.4                                                | Coccidioidomycosis                                                                        |
| 115.*                                                              | Histoplasmosis                                                                            |
| 116.*, except 116.2                                                | Blastomycotic infection                                                                   |
| 118                                                                | Opportunistic mycoses                                                                     |
| 121.*                                                              | Other trematode infections                                                                |
| 122.*                                                              | Echinococcosis                                                                            |
| 123.*                                                              | Other cestode infection                                                                   |
| 124                                                                | Trichinosis                                                                               |

| ICD-9-CM code       | Description                                                         |
|---------------------|---------------------------------------------------------------------|
| 125.*               | Filarial infection and dracontiasis                                 |
| 126.*               | Ancylostomiasis and necatoriasis                                    |
| 127.*               | Other intestinal helminthiases                                      |
| 128.*               | Other and unspecified helminthiases                                 |
| 129                 | Intestinal parasitism, unspecified                                  |
| 130.*               | Toxoplasmosis                                                       |
| 131.*               | Trichomoniasis                                                      |
| 132.*               | Pediculosis and phthirus infestation                                |
| 133.*               | Acariasis                                                           |
| 134.*               | Other infestation                                                   |
| 135                 | Sarcoidosis                                                         |
| 136.*               | Other and unspecified infectious and parasitic diseases             |
| 320.*               | Bacterial meningitis                                                |
| 321.*               | Meningitis due to other organisms                                   |
| 322.*               | Meningitis of unspecified cause                                     |
| 323.*               | Encephalitis myelitis and encephalomyelitis                         |
| 460                 | Acute nasopharyngitis [common cold]                                 |
| 461.*               | Acute sinusitis                                                     |
| 462                 | Acute pharyngitis                                                   |
| 463                 | Acute tonsillitis                                                   |
| 464.*               | Acute laryngitis and tracheitis                                     |
| 465.*               | Acute upper respiratory infections of multiple or unspecified sites |
| 466.*               | Acute bronchitis and bronchiolitis                                  |
| 480.*               | Viral pneumonia                                                     |
| 481                 | Pneumococcal pneumonia [Streptococcus pneumoniae pneumonia]         |
| 482.*               | Other bacterial pneumonia                                           |
| 483.*, except 483.0 | Pneumonia due to other specified organism                           |
| 484.*               | Pneumonia in infectious diseases classified elsewhere               |
| 485                 | Bronchopneumonia, organism unspecified                              |
| 486                 | Pneumonia, organism unspecified                                     |
| 487.*               | Influenza                                                           |
| 488.*               | Influenza due to certain identified influenza viruses               |
| 590.1*              | Acute pyelonephritis                                                |
| 595.0               | Acute cystitis                                                      |
| 598.0*              | Urethral stricture due to infection                                 |
| 599.0               | Urinary tract infection, site not specified                         |

ICD-9-CM: International Classification of Diseases, 9th Revision, Clinical Modification

**Table S4. Sensitivity analysis: Rate ratios of serious hypoglycemia occurrence from the use of insulin secretagogues or metformin with versus without concomitant use of angiotensin-converting enzyme inhibitors, including observation time censored by death**

| Object drug | Precipitant-exposed time* during observation time |                                            | Precipitant-unexposed time during observation time |                                            | Rate ratio† of serious hypoglycemia | 95% CI     |
|-------------|---------------------------------------------------|--------------------------------------------|----------------------------------------------------|--------------------------------------------|-------------------------------------|------------|
|             | Person-days                                       | Number of serious hypoglycemia occurrences | Person-days                                        | Number of serious hypoglycemia occurrences |                                     |            |
| glimepiride | 646,667                                           | 3,655                                      | 906,544                                            | 4,742                                      | 1.22                                | 1.10, 1.36 |
| glipizide   | 1,159,194                                         | 6,646                                      | 1,516,448                                          | 8,299                                      | 1.09                                | 1.01, 1.17 |
| glyburide   | 772,044                                           | 4,995                                      | 1,069,970                                          | 6,548                                      | 1.06                                | 0.97, 1.16 |
| nateglinide | 74,624                                            | 691                                        | 133,396                                            | 944                                        | 0.75                                | 0.58, 0.97 |
| repaglinide | 153,893                                           | 1,292                                      | 216,310                                            | 1,679                                      | 1.15                                | 0.95, 1.41 |
| metformin   | 4,117,449                                         | 15,401                                     | 4,650,250                                          | 17,588                                     | 1.01                                | 0.96, 1.06 |

CI: confidence interval (based on a two-tailed test). \*Precipitant-exposed time: days of concomitant use with a precipitant drug (angiotensin-converting enzyme inhibitor) during observation time since the initiation of the concomitant use. †Rate ratio: [(outcome occurrence rate during precipitant-exposed time)/(outcome occurrence rate during precipitant-unexposed time)]; confounder-adjusted.



**Table S5. Sensitivity analysis: Rate ratios of serious hypoglycemia occurrence from the use of insulin secretagogues or metformin with versus without concomitant use of angiotensin-converting enzyme inhibitors, excluding observation time with potentially incomplete data**

| Object drug | Precipitant-exposed time* during observation time |                                            | Precipitant-unexposed time during observation time |                                            | Rate ratio† of serious hypoglycemia | 95% CI     |
|-------------|---------------------------------------------------|--------------------------------------------|----------------------------------------------------|--------------------------------------------|-------------------------------------|------------|
|             | Person-days                                       | Number of serious hypoglycemia occurrences | Person-days                                        | Number of serious hypoglycemia occurrences |                                     |            |
| glimepiride | 374,834                                           | 2,192                                      | 525,836                                            | 2,853                                      | 1.18                                | 1.03, 1.35 |
| glipizide   | 574,171                                           | 3,570                                      | 775,037                                            | 4,419                                      | 1.05                                | 0.94, 1.17 |
| glyburide   | 431,881                                           | 2,947                                      | 615,082                                            | 3,827                                      | 1.06                                | 0.94, 1.19 |
| nateglinide | 48,181                                            | 502                                        | 93,645                                             | 662                                        | 0.78                                | 0.57, 1.06 |
| repaglinide | 89,588                                            | 836                                        | 128,675                                            | 1,057                                      | 1.33                                | 1.04, 1.70 |
| metformin   | 1,965,913                                         | 7,592                                      | 2,361,409                                          | 9,131                                      | 1.02                                | 0.95, 1.09 |

CI: confidence interval (based on a two-tailed test). \*Precipitant-exposed time: days of concomitant use with a precipitant drug (angiotensin-converting enzyme inhibitor) during observation time since the initiation of the concomitant use. †Rate ratio: [(outcome occurrence rate during precipitant-exposed time)/(outcome occurrence rate during precipitant-unexposed time)]; confounder-adjusted.
